# Supplementary material for: Synthesis of temperature- and humidity-induced dual stimulation film PU-PNIPAmn and its independent film formation as a smart window application
Source: Royal Society of Chemistry journal article supplement (doi:10.1039/d2ra08052d), 2023-01-01
Supplement: d2ra08052d1.pdf [file d2ra08052d1.pdf]

## Measurements

<sup>1</sup>H NMR spectrum was obtained on a Bruker AN 600 spectrometer at 25 °C with deuterated chloroform as the solvent.

Fourier transform infrared (FT-IR) spectra were measured on a Nicolet 560 spectrophotometer using KBr pellets in the range from 4000 to 400 cm<sup>-1</sup> under a resolution of 4 cm<sup>-1</sup> at ambient temperature.

SEM analysis employed by a Quanta 250 scanning electron microscope (FEI, USA) to analyze the cross-section morphologies of films.

All fully expanded samples in deionized (DI) water were measured by differential scanning calorimetry (DSC) with a Q20 TA instrument at a heating or cooling rate of 1 K/min in a nitrogen atmosphere with a temperature range of 0-100 °C.

Stress-strain curves were measured for quantitatively evaluating the mechanical properties of all samples by an Instron 4465 testing machine. The elongation rate was set to 50 mm/min. The dimensions of dumbbell-shaped specimens were 20 mm (length) × 4 mm (width) × 0.5 mm (thickness).

TGA was carried out with a TGAQ50 TA instrument under nitrogen and air atmosphere from 50 to 700 °C with a heating rate of 10 K/min, respectively. Differential scanning calorimetry (DSC) measurements of all samples were performed on a Q20 TA instrument with a heating or cooling rate of 5 K/min under nitrogen atmosphere.

The optical images of these samples were obtained using a Nikon D5200 camera.

The transmittance spectra in the wavelength range of 200-2800 nm were collected using a UV-Vis-NIR spectrophotometer (UV-3600, Shimadzu, Japan) at normal incidence and equipped with a heating and cooling stage (PE120, Linkam, UK).

The integral luminous transmittance  $T_{lum}$  (380-780 nm), IR transmittance  $T_{IR}$  (780-2500 nm) and solar transmittance  $T_{sol}$  (280-2500 nm) were calculated by Equation as follow: <sup>1</sup>

$$T_{lum / IR / solar} = \frac{\int \phi_{lum/IR/solar}(\lambda) T(\lambda) d\lambda}{\int \phi_{lum/IR/solar}(\lambda) d\lambda} \quad (1)$$

where  $T(\lambda)$  denotes the recorded transmittance at a particular wavelength,  $\phi_{lum}(\lambda)$  is the standard luminous efficiency function for the photopic vision<sup>2</sup> of human eyes in the wavelength range of 380-780 nm,  $\phi_{IR}(\lambda)$  and  $\phi_{sol}(\lambda)$  is the IR/solar irradiance spectrum for air mass 1.5 (corresponding to the sun standing 37° above the horizon with 1.5 atmosphere thickness, corresponds to a solar zenith angle of =48.2)<sup>3</sup>.

$$\Delta T_{lum/IR/sol} \text{ was obtained by } \Delta T_{lum/IR/sol} = T_{lum/IR/sol, 20^\circ\text{C}} - T_{lum/IR/sol, 40^\circ\text{C}} \cdot^{-1}$$

Table S1 Thermochromic Performance (Solar Transmittance Modulation,  $\Delta T_{sol}$ , after Phase Transition, and Luminous Transmittance,  $T_{lum}$ , before Phase Transition) in Some of the Best Reported PNIPAm-based Films.

| $\Delta T_{sol}$ | $T_{lum}$ | Thickness         | Ref.      |
|------------------|-----------|-------------------|-----------|
| 73.5%            | 80%       | 400 $\mu\text{m}$ | [4]       |
| 81.3%            | 87.2%     | 380 $\mu\text{m}$ | [5]       |
| 68.1%            | 90%       | 1 cm              | [6]       |
| 49.6%            | 85.8%     | 78 $\mu\text{m}$  | [7]       |
| 86.15%           | 82.75%    | 100 $\mu\text{m}$ | [8]       |
| 67.1%            | 94.5%     | 100 $\mu\text{m}$ | [9]       |
| 63.24%           | 59.53%    | 100 $\mu\text{m}$ | This work |

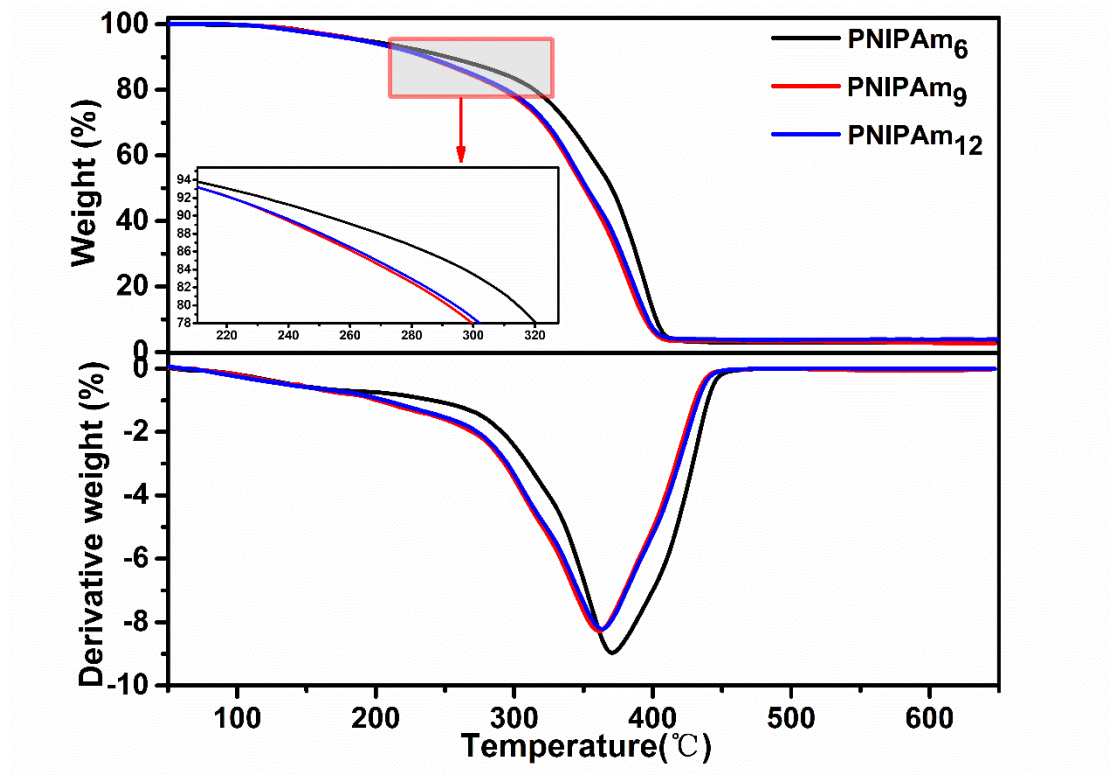

Fig.S1. The thermal stabilities of the PNIPAm<sub>n</sub>: (up) TGA and (down) DTG curves.

Table S2 Thermal stabilities of the PNIPAm<sub>n</sub>.

| Sample               | $T_{-5wt\%}$ (°C) | $T_{max1}$ (°C) | Residual mass (%) |
|----------------------|-------------------|-----------------|-------------------|
| PNIPAm <sub>6</sub>  | 193.49            | 370.77          | 2.96              |
| PNIPAm <sub>9</sub>  | 191.68            | 361.34          | 3.35              |
| PNIPAm <sub>12</sub> | 190.71            | 363.09          | 3.85              |

2. G. Wyszecki and W. S. Stiles, *Color science: concepts and methods, quantitative data and formulae*, John Wiley & Sons New York, NY, 1982.
3. S. Astm, G173 standard tables of reference solar spectral irradiances: direct normal and hemispherical on a 37 degree tilted surface, in: American Society for Testing and Materials.
4. Y. Zhou, M. Layani, S. Wang, P. Hu, Y. Ke, S. Magdassi and Y. Long, *Adv Funct Mater*, 2018, **28**, 1705365.
5. X. H. Li, C. Liu, S. P. Feng and N. X. Fang, *Joule*, 2019, **3**, 290-302.
6. Y. Zhou, S. Wang, J. Peng, Y. Tan, C. Li, F. Y. C. Boey and Y. Long, *Joule*, 2020, **4**, 1-17.
7. Y. Zhou, Y. Cai, X. Hu and Y. Long, *J. Mater. Chem. A*, 2014, **2**, 13550-13555.
8. J. Tian, J. Gu, H. Peng, H. Wang, Z. Du, X. Cheng and X. Du, *Composites Part A: Applied Science and Manufacturing*, 2021, **149**.
9. J. Tian, J. Xu, H. Peng, X. Du, H. Wang, Z. Du and X. Cheng, *Progress in Organic Coatings*, 2021, **160**.
